# Supplementary figures and images for: Upconversion nanoparticle-based aptasensor for rapid and ultrasensitive detection of Staphylococcus aureus by low-speed centrifugation
Source: Royal Society of Chemistry journal article supplement (doi:10.1039/d3ra01555f), 2023-01-01

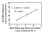

Supplement: d3ra01555f2.pdf [file d3ra01555f2.pdf]
